# Supplementary material for: Inhibition of NADPH oxidase 2 (NOX2) prevents sepsis-induced cardiomyopathy by improving calcium handling and mitochondrial function
Source: JCI journal article supplement (doi:10.1172/jci.insight.94248), 2017-09-06
Supplement: sd1 [file 1]

# Supplemental Information for “Inhibition of NADPH oxidase 2 (NOX2) prevents sepsis-induced cardiomyopathy by improving calcium handling and mitochondrial function ”

Table 1: Echocardiographic data from NOX2 inhibitor experiment

|         | LVIDd (mm) |      | LVIDs (mm) |      | FS, %  |      |
|---------|------------|------|------------|------|--------|------|
|         | mean       | SEM  | mean       | SEM  | mean   | SEM  |
| control | 2.77       | 0.13 | 1.80       | 0.19 | 35.10  | 4.54 |
| LPS     | 3.08       | 0.28 | 2.62*      | 0.21 | 14.67* | 2.10 |
| LPS+apo | 2.86       | 0.28 | 2.00       | 0.22 | 30.52  | 4.45 |
| apo     | 2.97       | 0.08 | 1.93       | 0.18 | 35.06  | 4.17 |

Table 2: Echocardiographic data from PKC inhibitor experiment

|               | LVIDd (mm) |      | LVIDs (mm) |      | FS, %  |      |
|---------------|------------|------|------------|------|--------|------|
|               | mean       | SEM  | mean       | SEM  | mean   | SEM  |
| control       | 3.30       | 0.06 | 1.98       | 0.16 | 39.89  | 5.00 |
| LPS           | 3.30       | 0.05 | 2.71*      | 0.14 | 17.87* | 3.26 |
| LPS+PKC inhib | 3.38       | 0.20 | 2.31       | 0.35 | 32.71  | 7.34 |

LVID = left ventricular internal diameter, diastolic and systolic, FS = fractional shortening, LVM = left ventricular mass, \* indicates significantly different from control by post-hoc test.

## Supplemental figures

Supplemental figure 1:

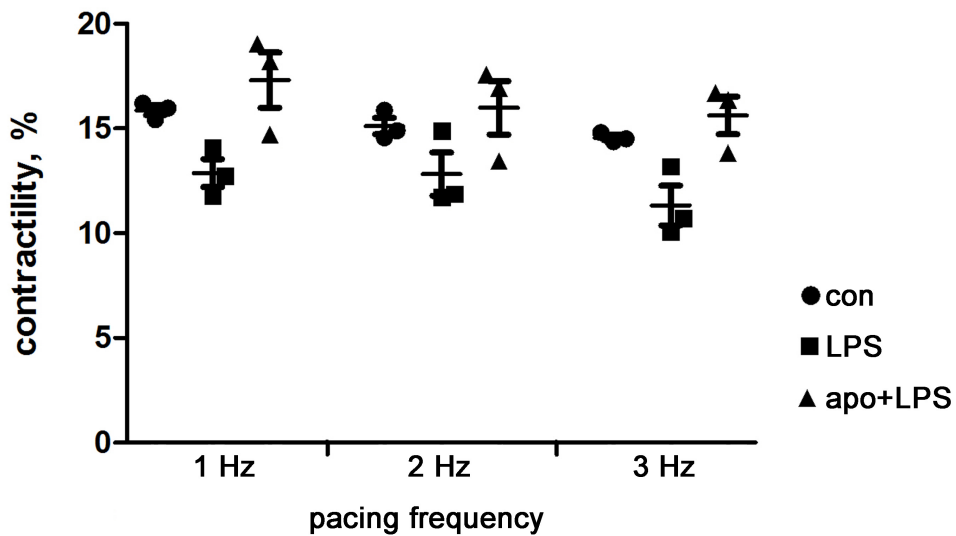

**Supplemental figure 1, Apocynin preserves contractility at multiple pacing frequencies:**

Graph of isolated WT cardiomyocyte contractility paced at 1, 2, and 3 Hz, percent sarcomere shortening from baseline sarcomere length, for cardiomyocytes treated with LPS and/or apocynin, mean + SEM, n= 3 cardiomyocyte isolations from different hearts. At each frequency, the means are different by ANOVA.

## Supplemental figure 2:

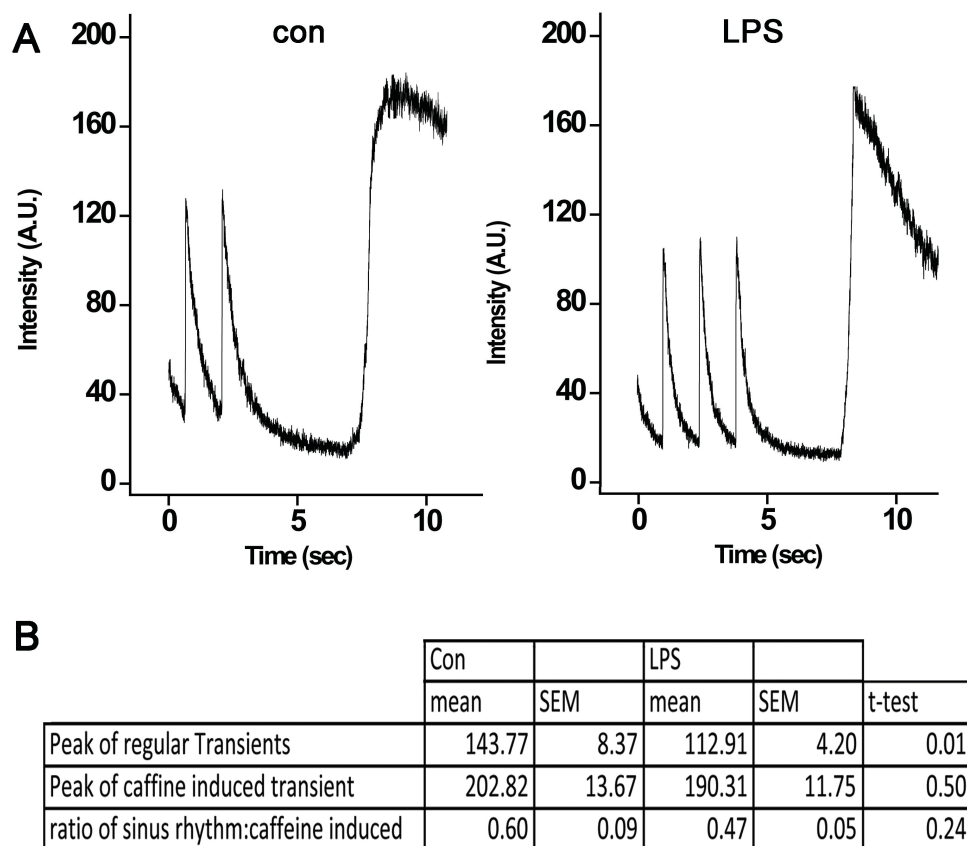

## Supplemental figure 2: Sarcoplasmic reticulum calcium load

A. Examples of raw data from experiments using isolated WT cardiomyocytes with caffeine to determine SR calcium load.

B. Table quantifying results of caffeine experiments, n=6 each group from 2 separate cardiac isolations

Supplemental figure 3:

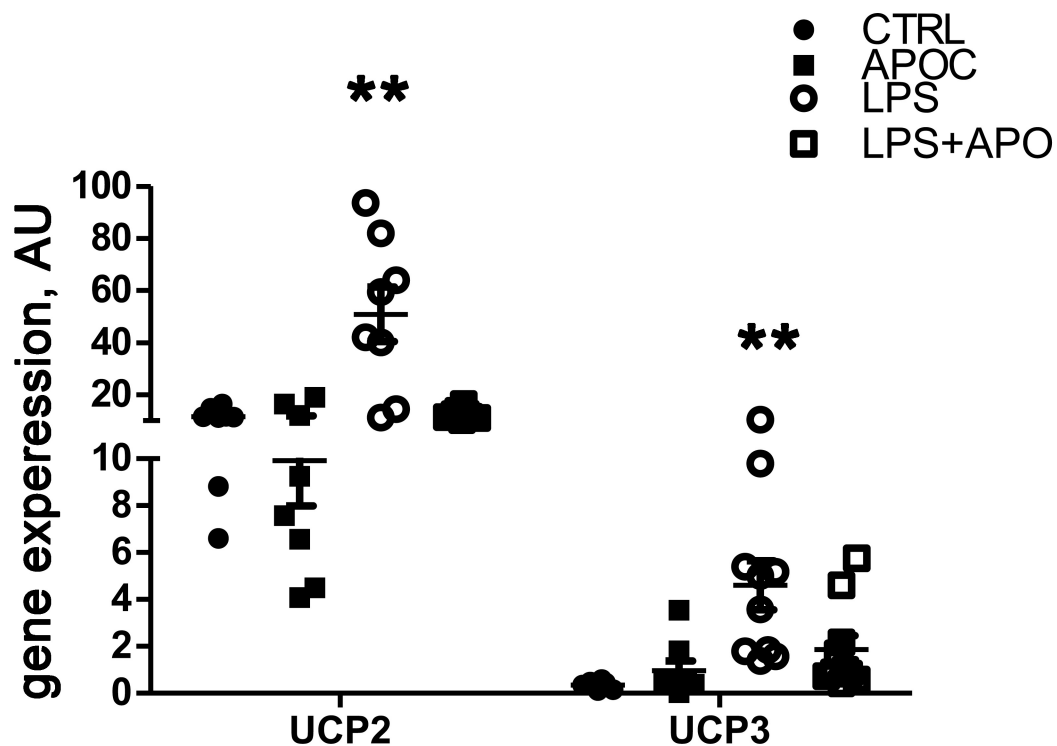

Supplemental figure 3: NOX inhibition prevents upregulation of UCP in the heart

Graph of cardiac Ucp2 and Ucp3 mRNA expression. For each gene, the means are different by ANOVA, \*\* indicates  $p < 0.01$  significant difference from control by post-hoc test.

## Supplemental figure 4:

**A**

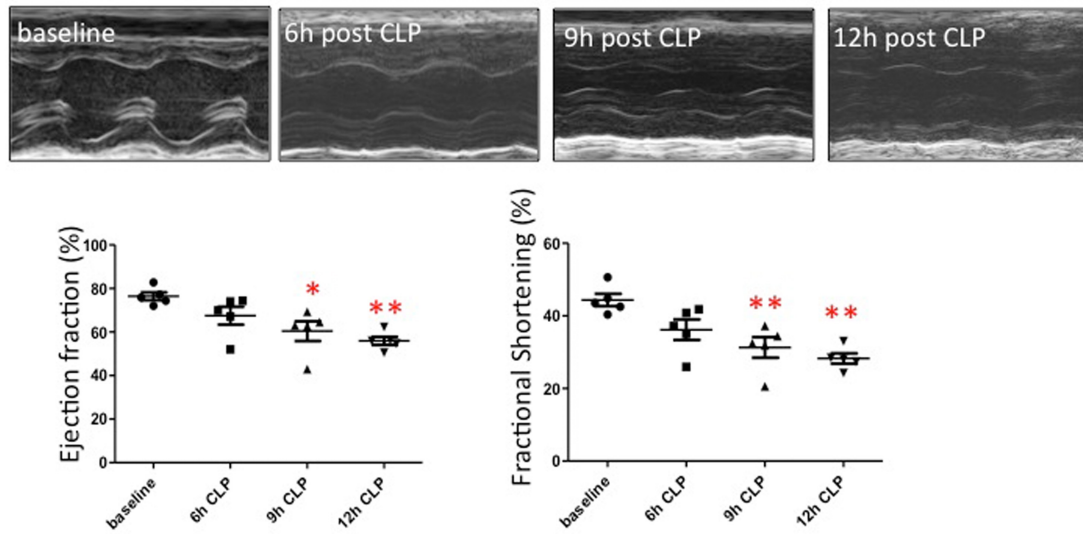

**B**

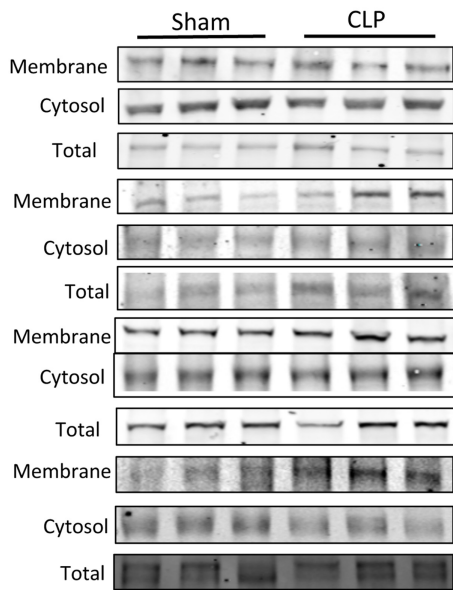

**C**

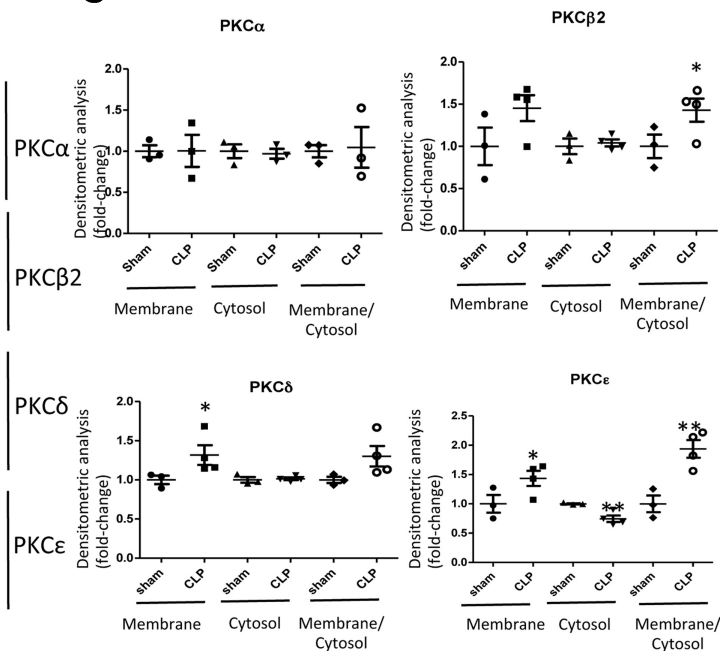

## Supplemental figure 4: PKC isoforms are activated in the heart after cecal ligation and puncture (CLP)

A. Time-course of echocardiograms after CLP surgery. Cardiac dysfunction is statistically significant at 9hrs post CLP. N=5 mice, one way ANOVA analysis \*p<0.05 vs baseline. \*\*p<0.01 vs baseline. Data are presented as mean with SEM

B. PKC isoforms western blots, membrane and cytosolic fraction, from ventricular tissue of C57BL/6 mice undergoing sham surgery or CLP.

C. Densitometry analysis of PKC western blots, in relative units. Unpaired t-test \*p<0.05, \*\*p<0.01

**Supplemental figure 5:**

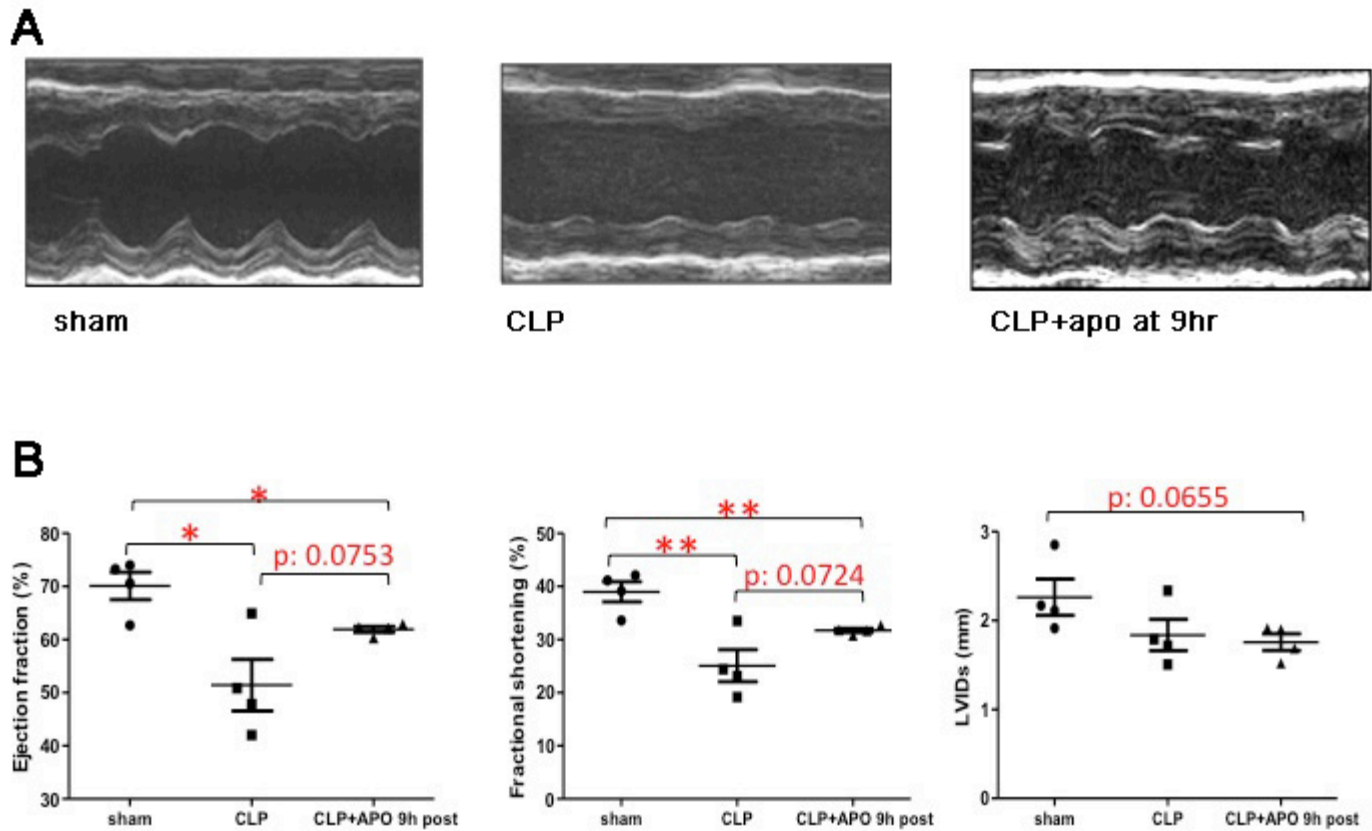

**Supplemental figure 5: Apocynin given after the onset of cardiac dysfunction caused by cecal ligation and puncture (CLP)**

A. Representative echocardiograms after sham, CLP surgery, or CLP with apocynin given 9 hours after CLP surgery.

B. Graphs of echo parameters from experiments involving WT mice in the following groups: sham, CLP surgery, or CLP with apocynin given 9 hours after CLP surgery. N= 4 mice/group; for EF%; \*p<0.05, \*\*p<0.01.

## Supplemental figure 6:

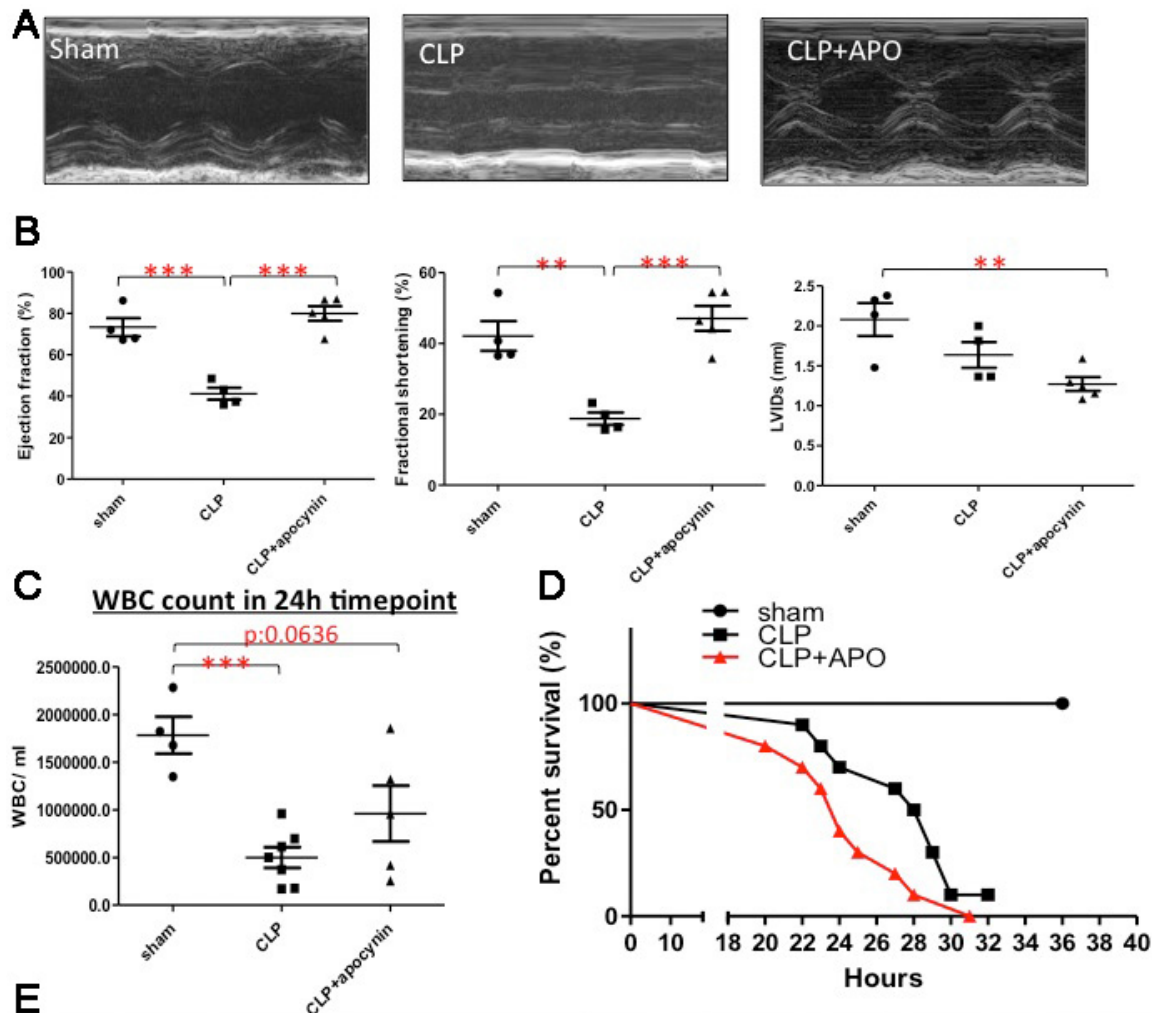

**Supplemental figure 6: Apocynin effects 24 hours after cecal ligation and puncture (CLP)**

A. Representative echocardiograms. Sham: n=4, CLP: n=4, CLP+apocynin: n=5

B. Graphs of echo parameters. The means are different by ANOVA; \*\*p:<0.01 \*\*\*p:<0.001

C. WBC count from CLP mice

D. Survival curves. N=4 mice in the sham group, N=10 mice in the CLP group, N=10 mice in the CLP+apocynin group.

The drug was given during the surgery and then again at 12 hrs. The sham and CLP mice received DMSO (vehicle control) at these time-points.

E. Table of echocardiogram measurements

## Supplemental Figure 7:

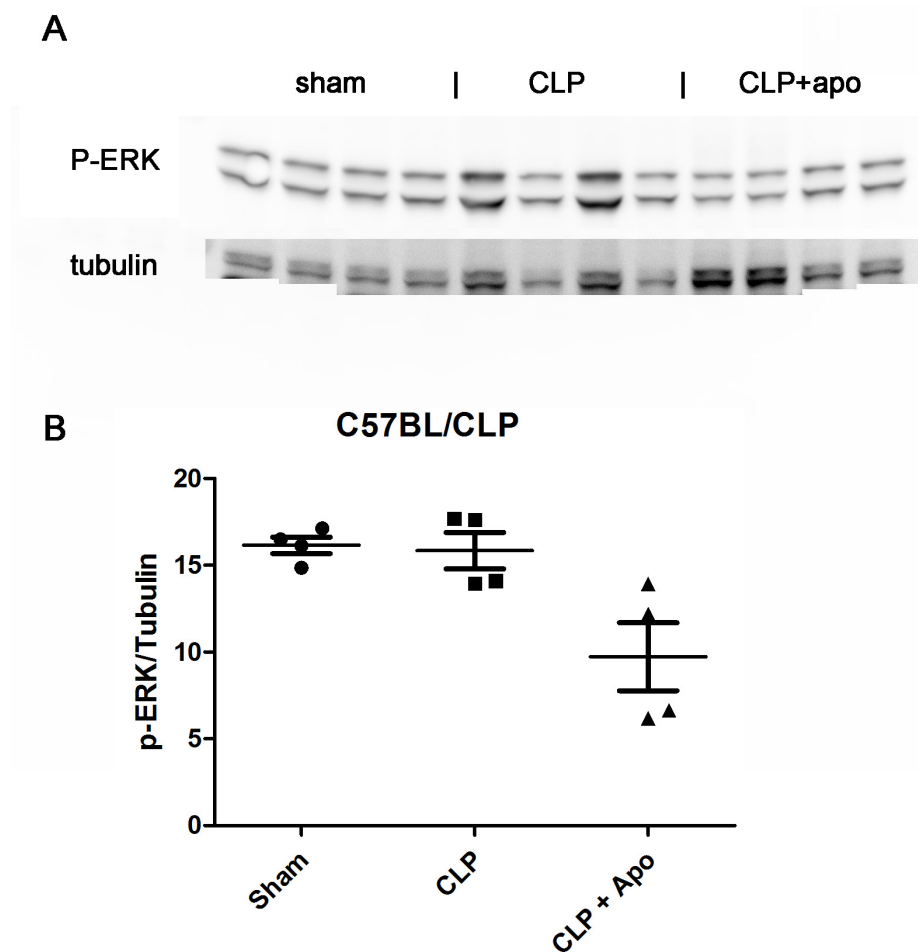

## Supplemental Figure 7: P-ERK western blot after CLP

A: Western blot of P-ERK and tubulin loading control from the same membrane.

B: Graph of quantification of P-ERK western blot adjusted for tubulin loading control.
